# Supplementary material
Source: Springer Nature journal article supplement (https://www.springermedizin.de/resource/supplementary/12911_2009_304_MOESM5_ESM.pdf/9525492)

# Work flow interpreter

Flow chart in XML

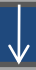

Pre-processing XML

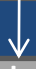

Combined Reasoning

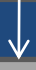

Post-processing XML

Medical data from patients (IZIS)

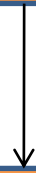

ICSP

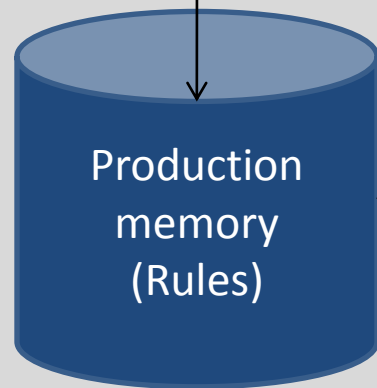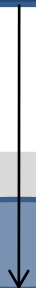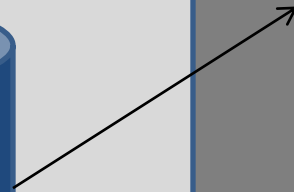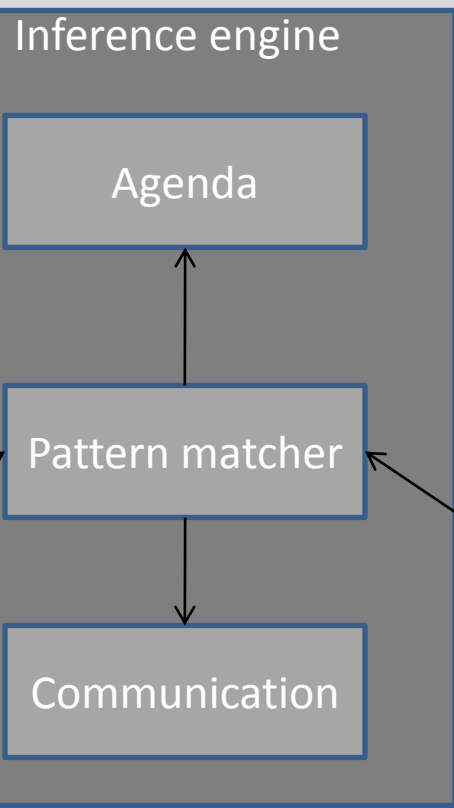

Agenda

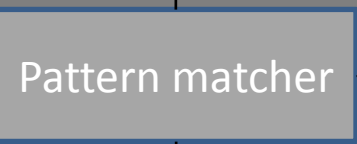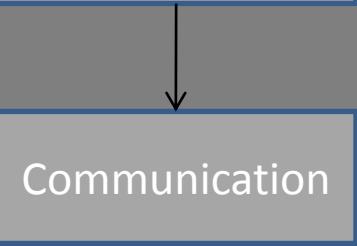

Pattern matcher

Communication

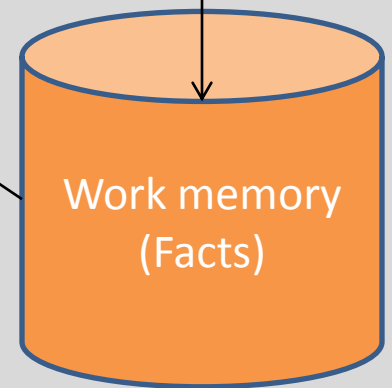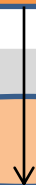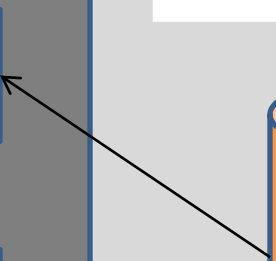

Supplement: MOESM5 [file 9525492]
